# Supplementary material
Source: Research Square preprint supplement (doi:10.21203/rs.3.rs-9236222/v1)
Supplement: Supplementary file 1 [file 7d7d8d72cfe260480af71029.docx]

Supplementary Table 1. Clinical and pathologic characteristics of the enrolled 188 patients

|  | pCR | non-pCR | p value |
| --- | --- | --- | --- |
| Number | 55 | 133 |  |
| Age |  |  |  |
| Tumor size |  |  | 0.988 |
| T1 | 4 | 9 |  |
| T2 | 39 | 94 |  |
| T3-4 | 12 | 30 |  |
| Lymph node |  |  | 0.749 |
| negative | 17 | 38 |  |
| positive | 38 | 95 |  |
| ER |  |  | 0.008 |
| negative | 37 | 61 |  |
| positive | 18 | 72 |  |
| Neoadjuvant therapy |  |  |  |
| anti-Her2 agents |  |  | 0.183 |
| Trastuzumab alone | 26 | 77 |  |
| Dual blockade | 29 | 56 |  |
| chemotherapy |  |  |  |
| taxane | 55 | 133 |  |
| anthracycline | 23 | 81 | 0.017 |
| platinum | 5 | 14 | 0.766 |
| gene mutation |  |  |  |
| TP53 | 26 | 57 | 0.579 |
| PIK3CA | 10 | 15 | 0.205 |
| PTEN | 10 | 33 | 0.325 |

Supplementary Table 2. Gene list of the antigen presenting B-cell signature.

| **Immunoglobulin gene** | **RAG1** | **Antigen presentation** |
| --- | --- | --- |
| IGKV5-2 | RAG1 | CD74 |
| IGKV6-21 |  | CIITA |
| IGKV6D-21 |  | CTSS |
| IGLC1 |  | HLA-DOA |
| IGLC2 |  | HLA-DPA1 |
| IGLC3 |  | HLA-DQA1 |
| IGLC7 |  | HLA-DQA2 |
| IGHV3-66 |  | HLA-DQB1 |
| IGHV1-46 |  | HLA-DQB2 |
| IGHG1 |  |  |
| IGHG2 |  |  |
| IGHG3 |  |  |
| IGHG4 |  |  |
| IGHGP |  |  |
| IGLV1-36 |  |  |
| IGLV1-40 |  |  |
| IGLV1-41 |  |  |
| IGLV1-44 |  |  |
| IGLV1-47 |  |  |
| IGLV1-50 |  |  |
| IGLV1-51 |  |  |
| IGLV1-62 |  |  |
| IGLV2-11 |  |  |
| IGLV2-14 |  |  |
| IGLV2-18 |  |  |
| IGLV2-23 |  |  |
| IGLV3-27 |  |  |
| IGKV1-16 |  |  |
